# Supplementary material
Source: PubMed Central journal article supplement (PMC4976036)
Supplement: NIHMS794948-supplement-1.pdf [file NIHMS794948-supplement-1.pdf]

**S1 Table<sup>1</sup>: Antibody panels for flow cytometry**

| Antigen             | Conjugate            | Clone     | Supplier        |
|---------------------|----------------------|-----------|-----------------|
| <i>Panel 1</i>      |                      |           |                 |
| CD3                 | ECD                  | UCHT1     | Beckman-Coulter |
| CD4                 | Qdot605              | S3.5      | Invitrogen      |
| CD8                 | APC-H7               | SK1       | BD              |
| TCR- $\gamma\delta$ | Brilliant Violet 421 | B1        | BD              |
| CD56                | Brilliant Violet 711 | HCD56     | BioLegend       |
| IFN $\gamma$        | AlexaFluor700        | B27       | BD              |
| TNF $\alpha$        | PECy7                | MAb11     | eBioscience     |
| IL-2                | APC                  | MQ1-17H2  | BD              |
| IL-17               | AlexaFluor488        | N49-653   | BD              |
| IL-22               | PE                   | IC7821P   | R&D             |
| <i>Panel 2</i>      |                      |           |                 |
| CD3                 | APC-H7               | SK7       | BD              |
| CD8                 | Brilliant Violet 650 | RPA-T8    | BD              |
| CD16                | Brilliant Violet 510 | 3G8       | BioLegend       |
| CD26                | APC                  | BA5b      | BioLegend       |
| CD56                | Brilliant Violet 711 | HCD56     | BioLegend       |
| CD57                | Brilliant Violet 605 | NK-1      | BioLegend       |
| CD66 (dump)         | FITC                 | B1.1/CD66 | BD              |
| CD158b              | PE                   | CH-L      | BD              |
| CD161               | PECy5                | DX12      | BD              |
| IFN $\gamma$        | AlexaFluor700        | B27       | BD              |
| TNF $\alpha$        | PECy7                | MAb11     | eBioscience     |
| Perforin            | Brilliant Violet 421 | B-D48     | BioLegend       |

<sup>1</sup> **S1 Table.** Antibody cocktails used in flow cytometry analysis of whole blood assays.

**S1 Fig:**

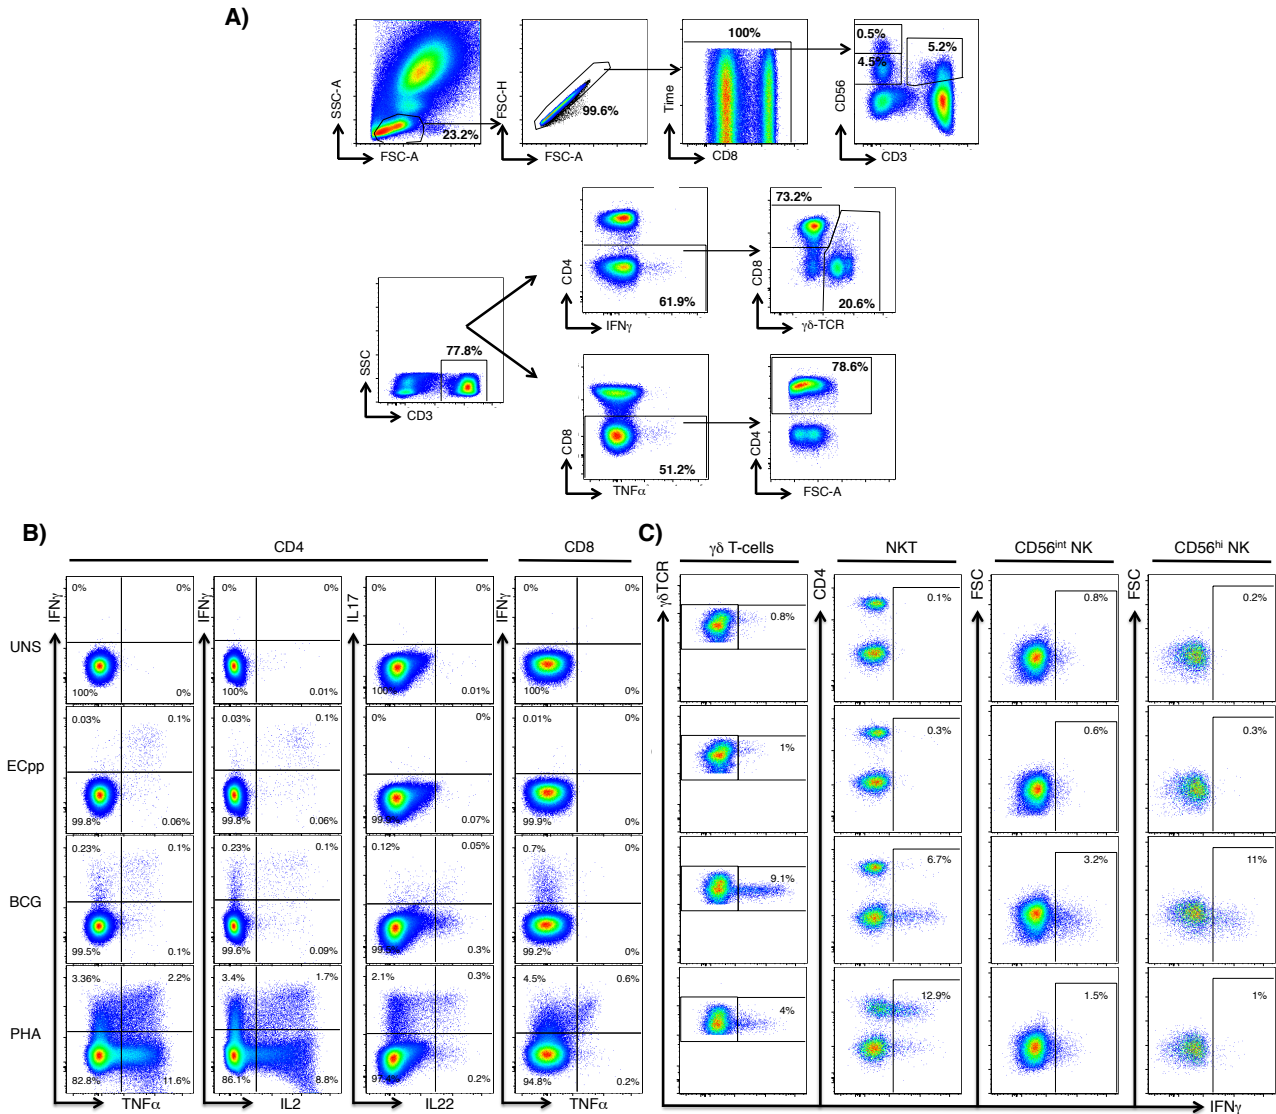

**S1 Fig. Flow cytometry gating strategy:** (A) Gating strategy applied to analyze stimulated whole blood samples. Small lymphocytes were gated based on forward (FSC) and side scatter (SSC), followed by doublet exclusion using FSC-area vs FSC-height. Then, to ensure uniform fluorescence during acquisition, a time gate was applied before identifying two CD3<sup>-</sup> natural killer (NK) cell subsets, defined as CD56<sup>hi</sup> and CD56<sup>dim</sup>. From the time gate, we also identified  $\gamma\delta$  T and CD8<sup>+</sup> T cells amongst CD3<sup>+</sup>CD4<sup>-</sup> cells (middle row) while CD4<sup>+</sup> T cells were identified amongst CD3<sup>+</sup>CD8<sup>-</sup> cells (bottom row). (B and C) Flow cytometric measurement of intracellular cytokine expression. (B) Representative plots illustrating cytokine expression in CD4<sup>+</sup> and CD8<sup>+</sup> T cells from a single whole blood sample. Rows correspond to the four stimulation conditions used in the assay. (C) IFN $\gamma$ -expression by  $\gamma\delta$  T cells, CD3<sup>+</sup>CD56<sup>+</sup> NKT-like cells, CD3<sup>-</sup>CD56<sup>dim</sup> NK and CD3<sup>-</sup>CD56<sup>hi</sup> NK cells.

S2 Fig:

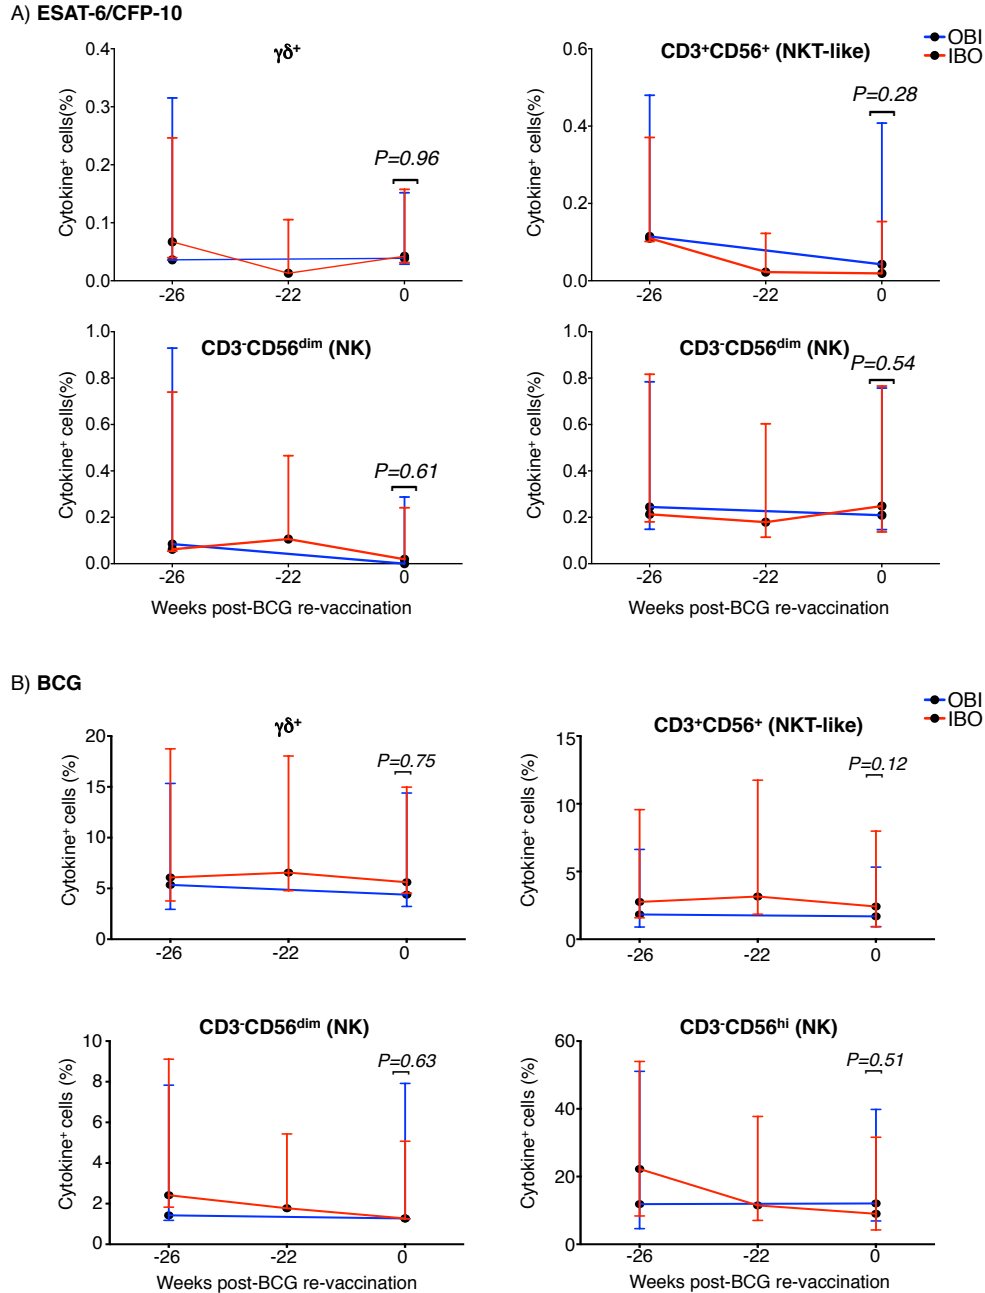

**S2 Fig. Impact of INH treatment on antigen-specific responses to ESAT-6/CFP10 peptide pools (A) or BCG stimulation (B):** Frequencies of antigen-reactive cytokine<sup>+</sup>  $\gamma\delta$  (top left) T cells, CD3<sup>+</sup>CD56<sup>+</sup> NKT-like (top right), CD3<sup>+</sup>CD56<sup>dim</sup> NK (bottom left), and CD3<sup>+</sup>CD56<sup>hi</sup> NK (bottom right) cells. All frequencies were background subtracted. Red and blue lines correspond to group treated (IBO) or not treated (OBI) with INH for 6 months, respectively, in the time window preceding BCG re-vaccination. Unadjusted p-values were calculated with the Mann-Whitney *U*-test, comparing frequencies of cytokine-expressing cells between the two groups in each of the 6 immune subsets at the end of the 6-month INH Rx or observation. P-values below 0.025, correcting for testing in two groups using the Bonferroni method were considered statistically significant.

**S3 Fig:**

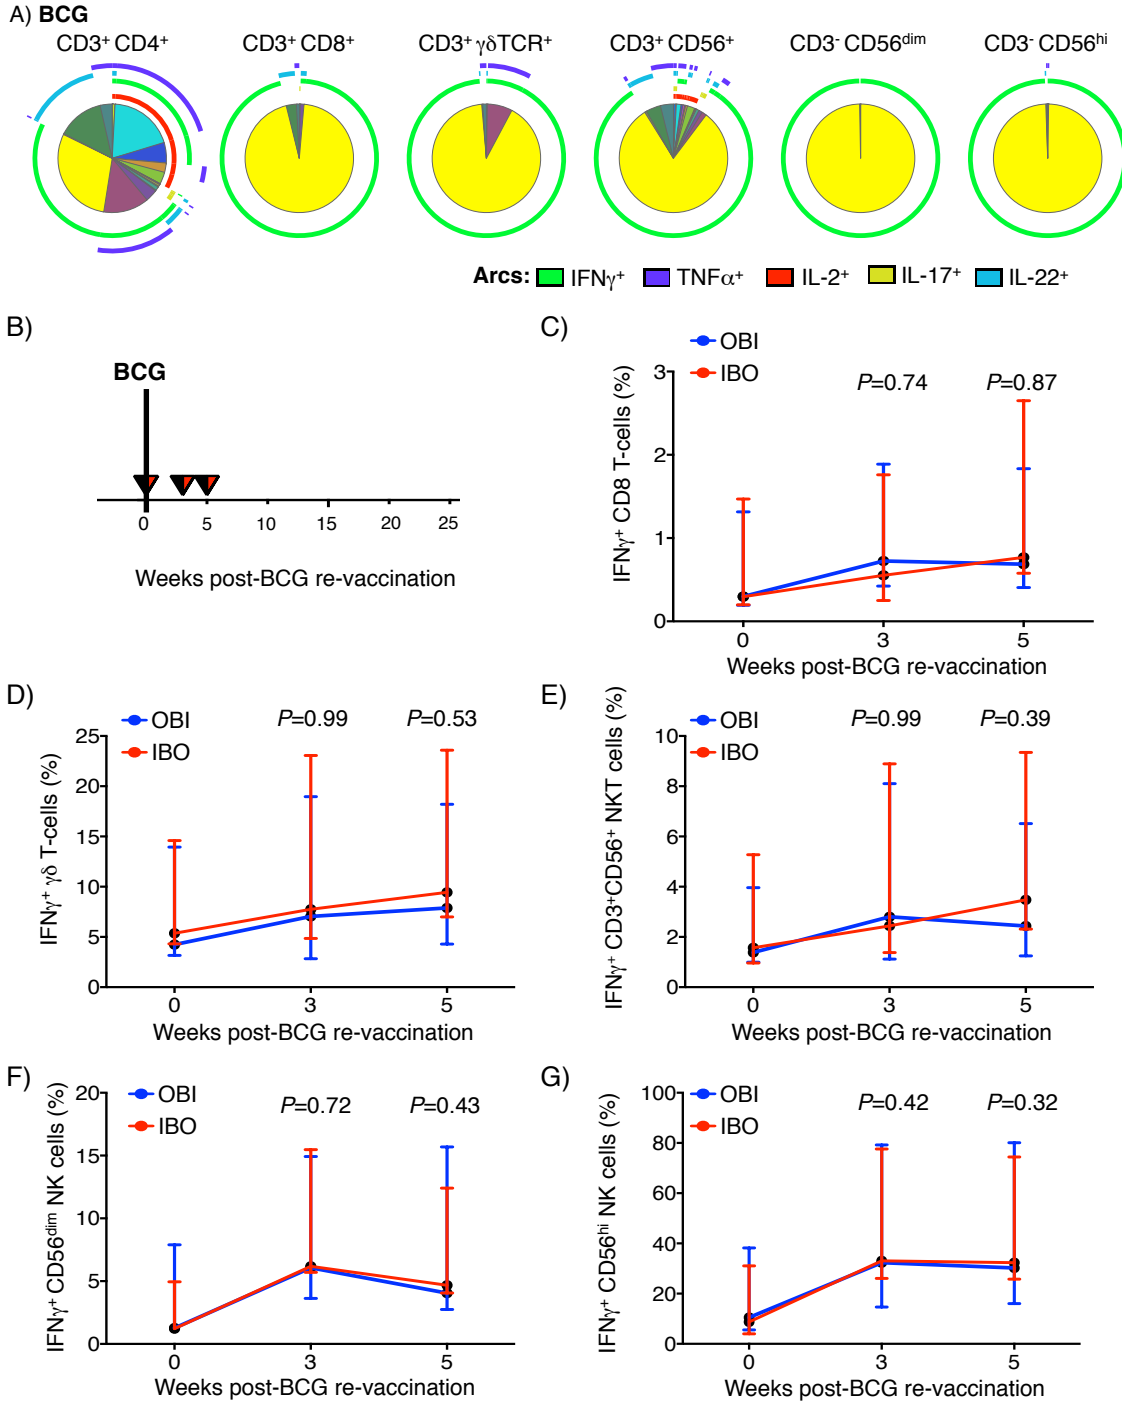

**S3 Fig. Impact of INH pre-treatment on frequency of BCG-specific IFN $\gamma$  production by non-CD4 T cells.** (A) Pie charts showing median proportions of BCG-specific CD4, CD8,  $\gamma\delta$  T, CD3<sup>+</sup>CD56<sup>+</sup> NKT-like, CD3<sup>-</sup>CD56<sup>dim</sup> NK, and CD3<sup>-</sup>CD56<sup>hi</sup> NK cells co-expressing IFN $\gamma$ , TNF $\alpha$ , IL-2, IL-17, and/or IL-22 at 3 weeks post-vaccination. (B) Schematic diagram of blood draws to assess short-term boosting of BCG-specific responses. Median frequencies (error bars denote IQR) of IFN $\gamma$ -expressing (C) CD8 T cells (defined as CD3<sup>+</sup>CD4<sup>-</sup>CD8<sup>+</sup> cells), (D)  $\gamma\delta$  T cells, (E) CD3<sup>+</sup>CD56<sup>+</sup> NKT-like cells, (F) CD3<sup>-</sup>CD56<sup>dim</sup> NK, and (G) CD3<sup>-</sup>CD56<sup>hi</sup> NK cells. Unadjusted p-values, calculated with Mann-Whitney *U*-tests, represent inter-group comparisons.
